# Supplementary material
Source: PubMed Central journal article supplement (PMC8451012)
Supplement: sj-pdf-1-jrs-10.1177_01410768211032850.pdf [file sj-pdf-1-jrs-10.1177_01410768211032850.pdf]

## Supplement

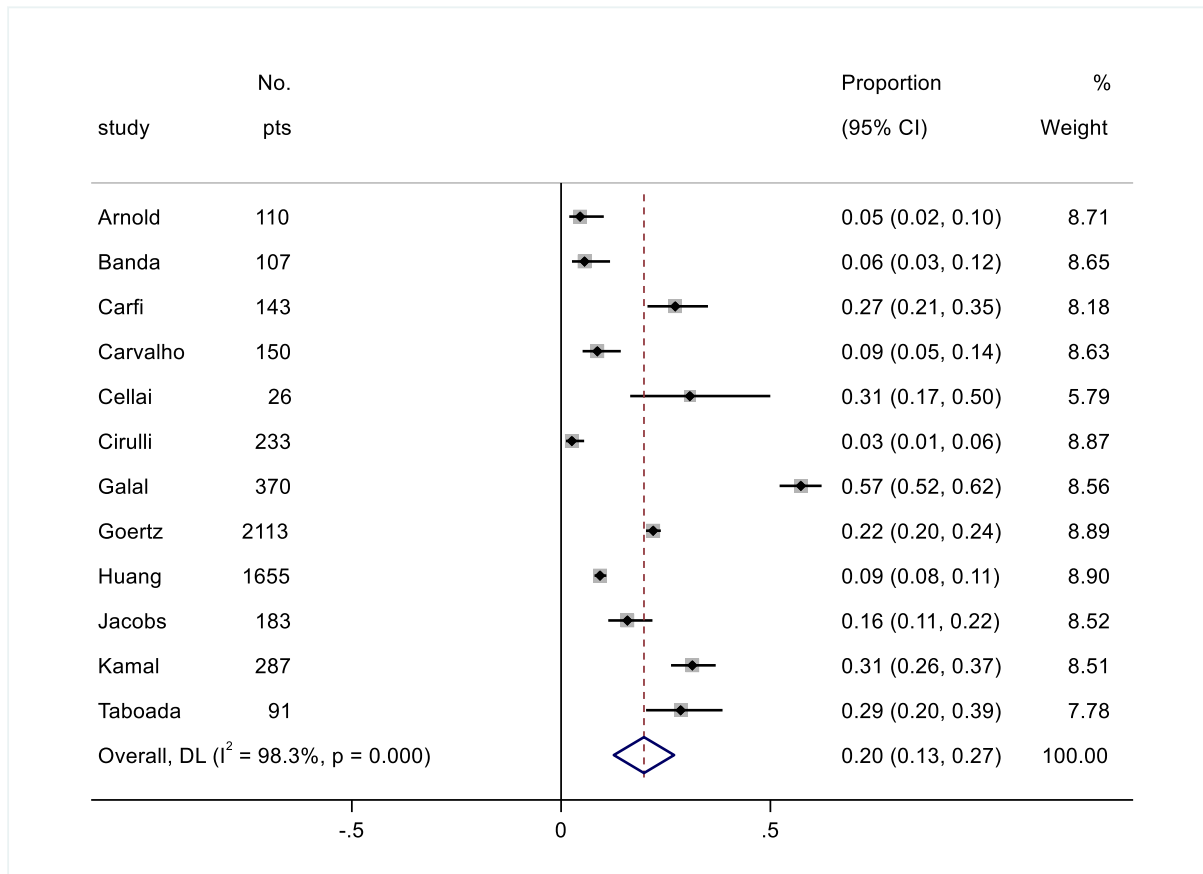

Figure S1. Pooled estimate of the prevalence of joint pain in patients with long COVID-19

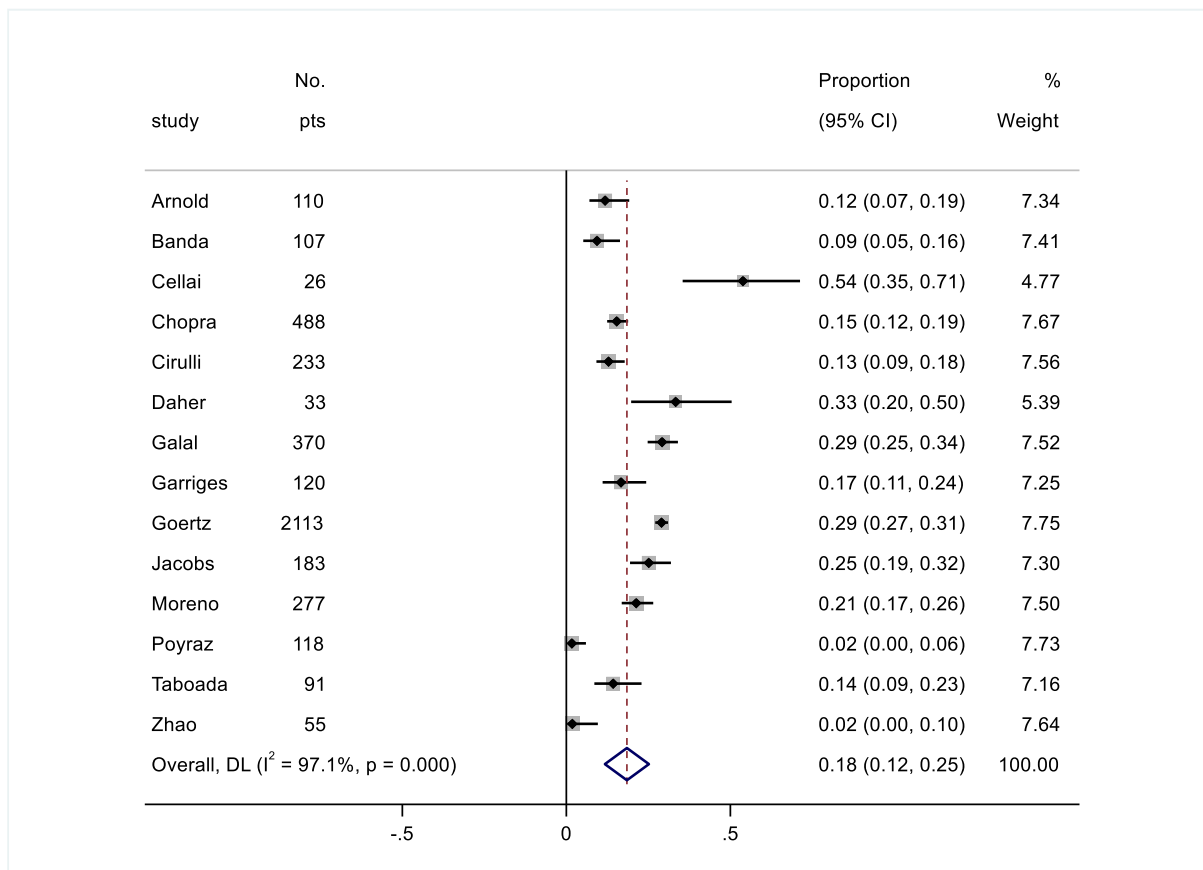

Figure S2. Pooled estimate of the prevalence of cough in patients with long COVID-19

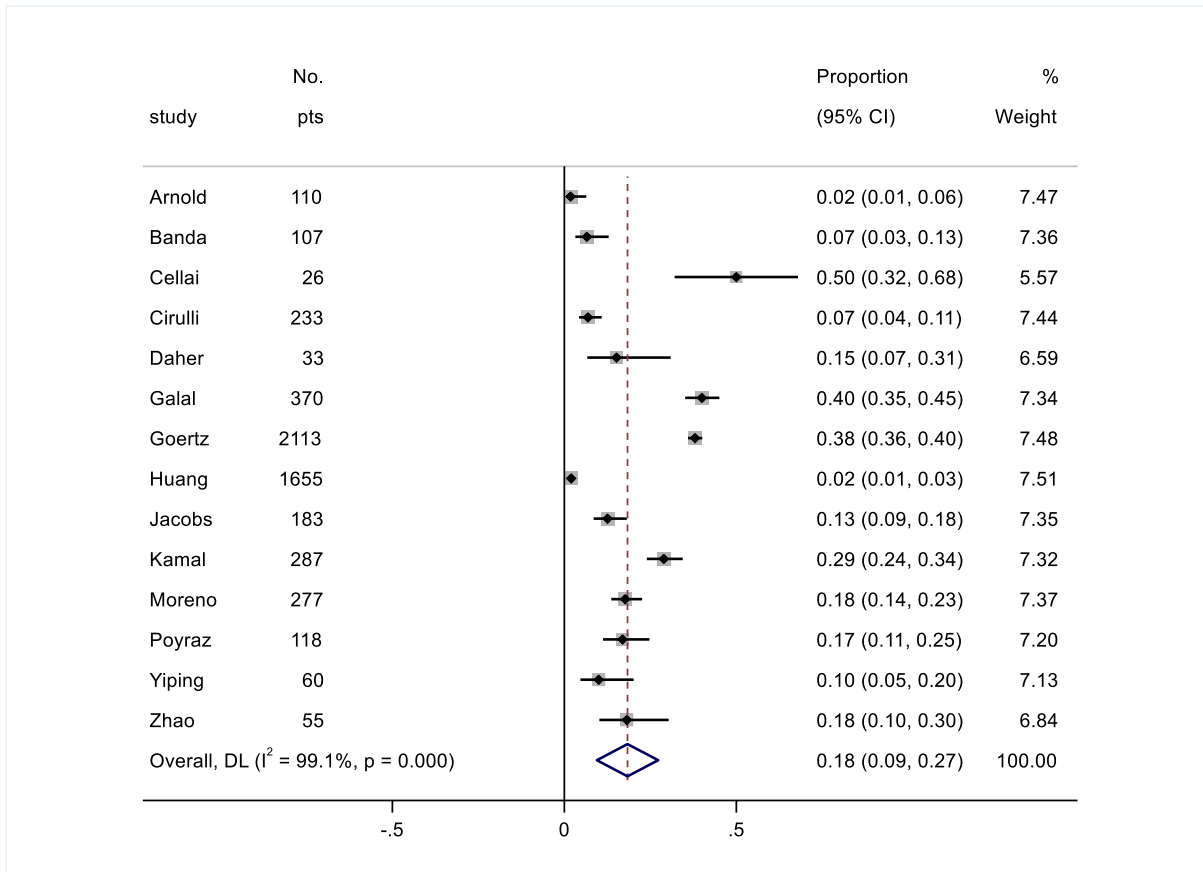

Figure S3. Pooled estimate of the prevalence of headache in patients with long COVID-19

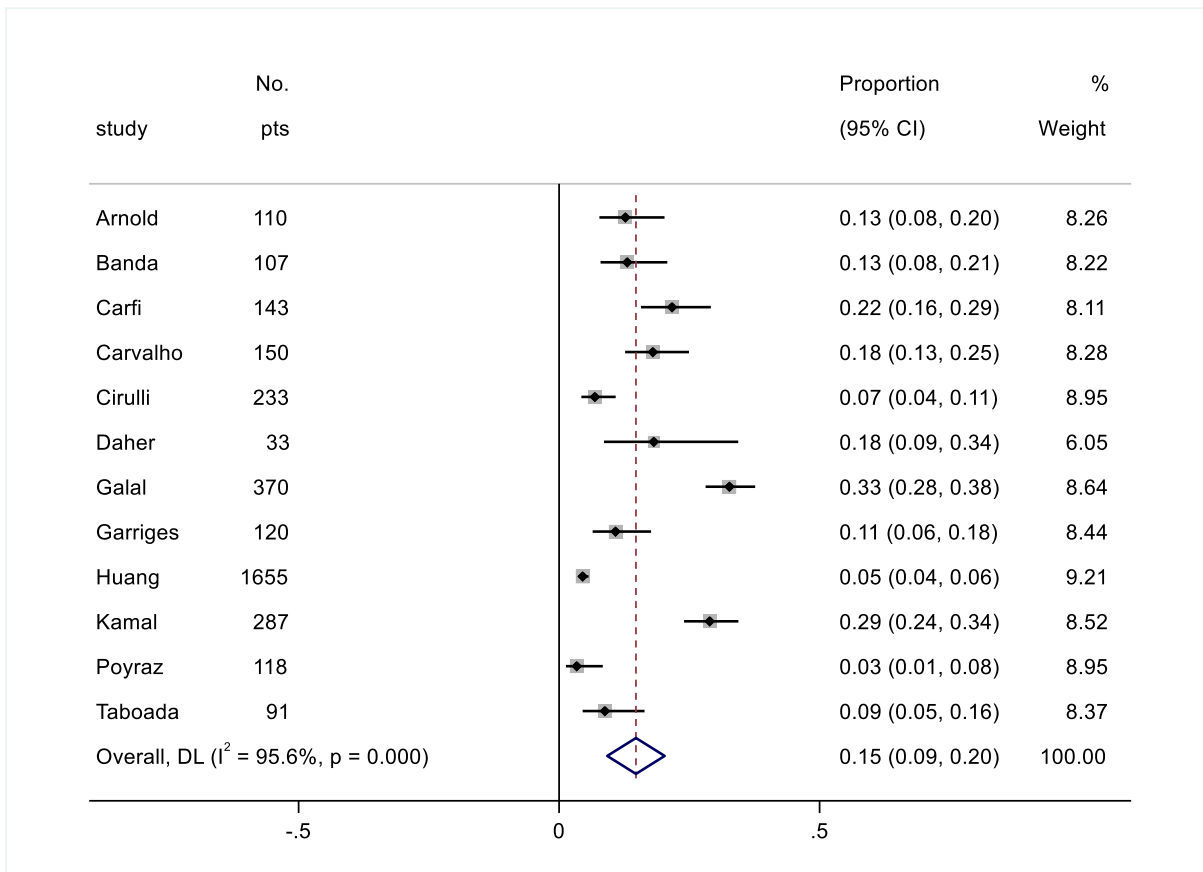

Figure S4. Pooled estimate of the prevalence of chest pain in patients with long COVID-19

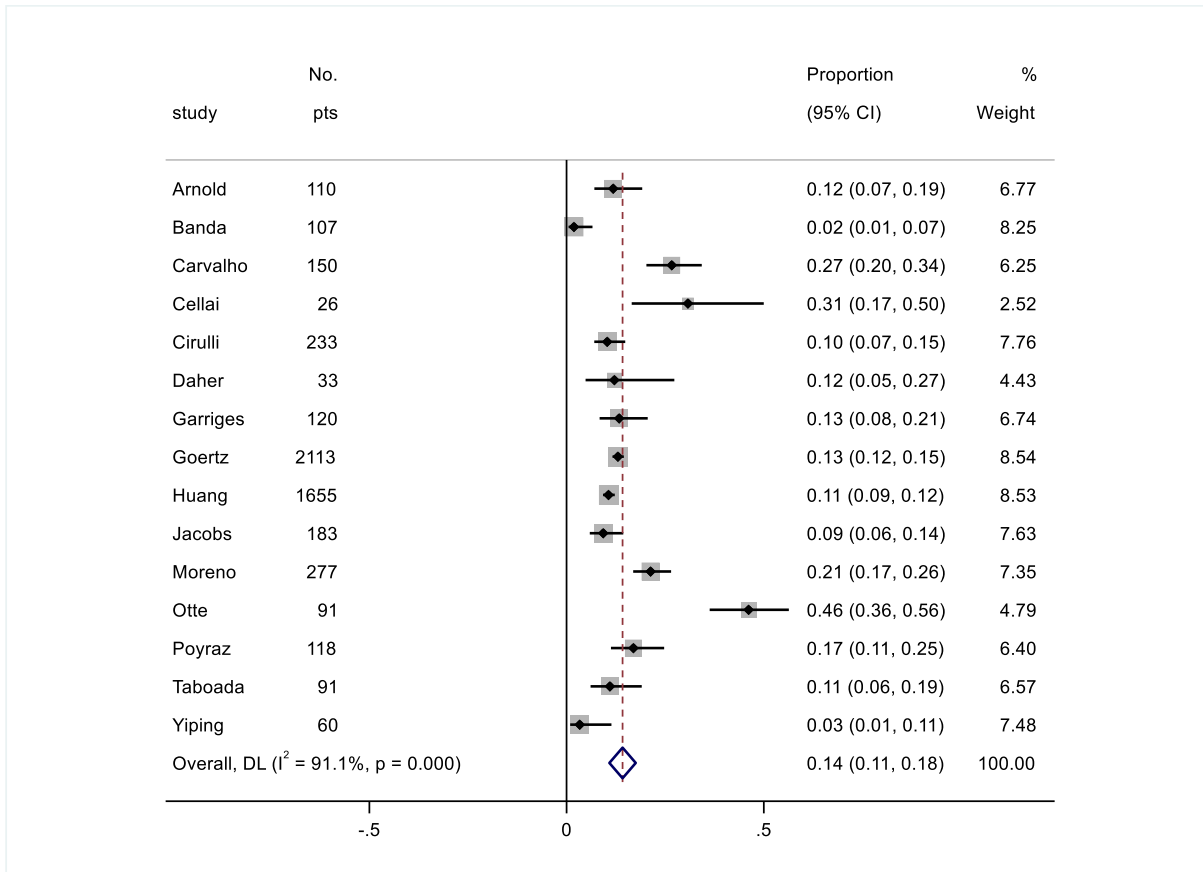

Figure S5. Pooled estimate of the prevalence of altered smell in patients with long COVID-19

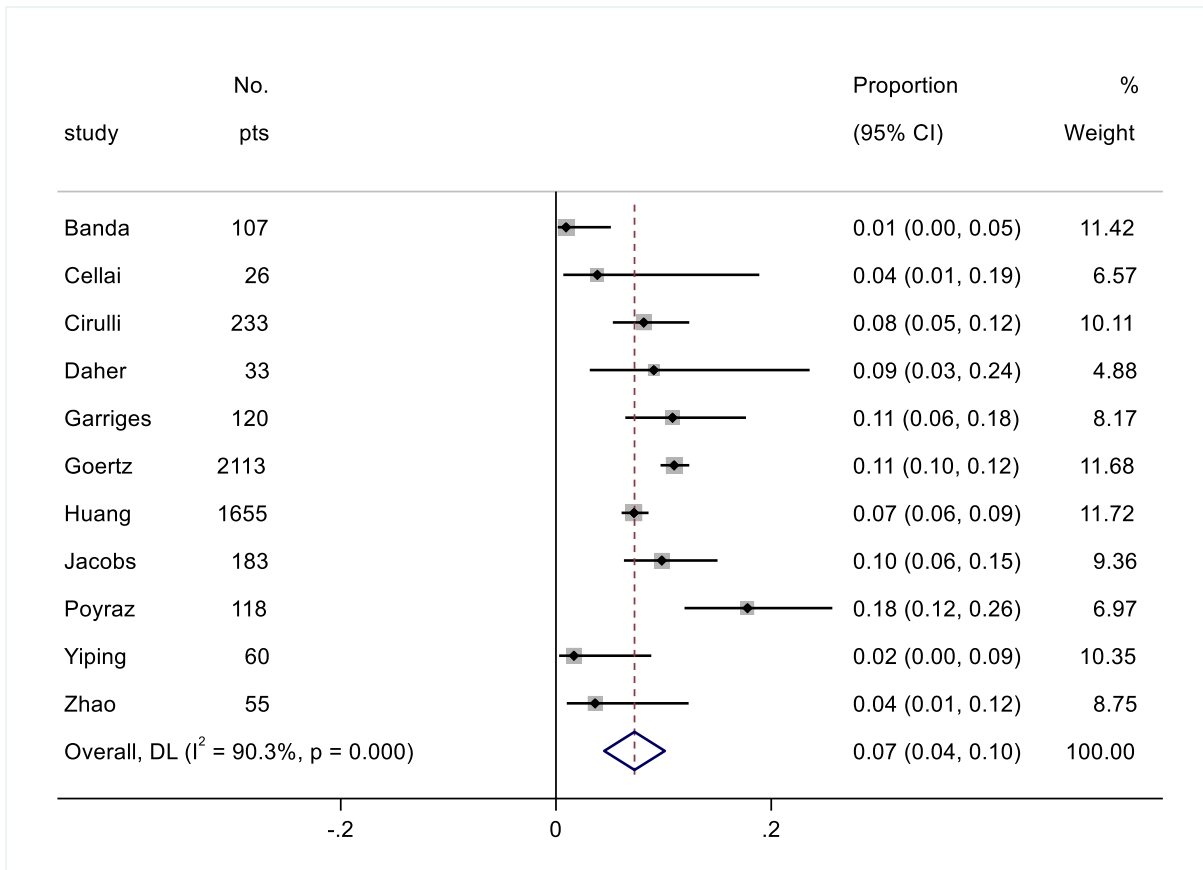

Figure S6. Pooled estimate of the prevalence of altered taste in patients with long COVID-19

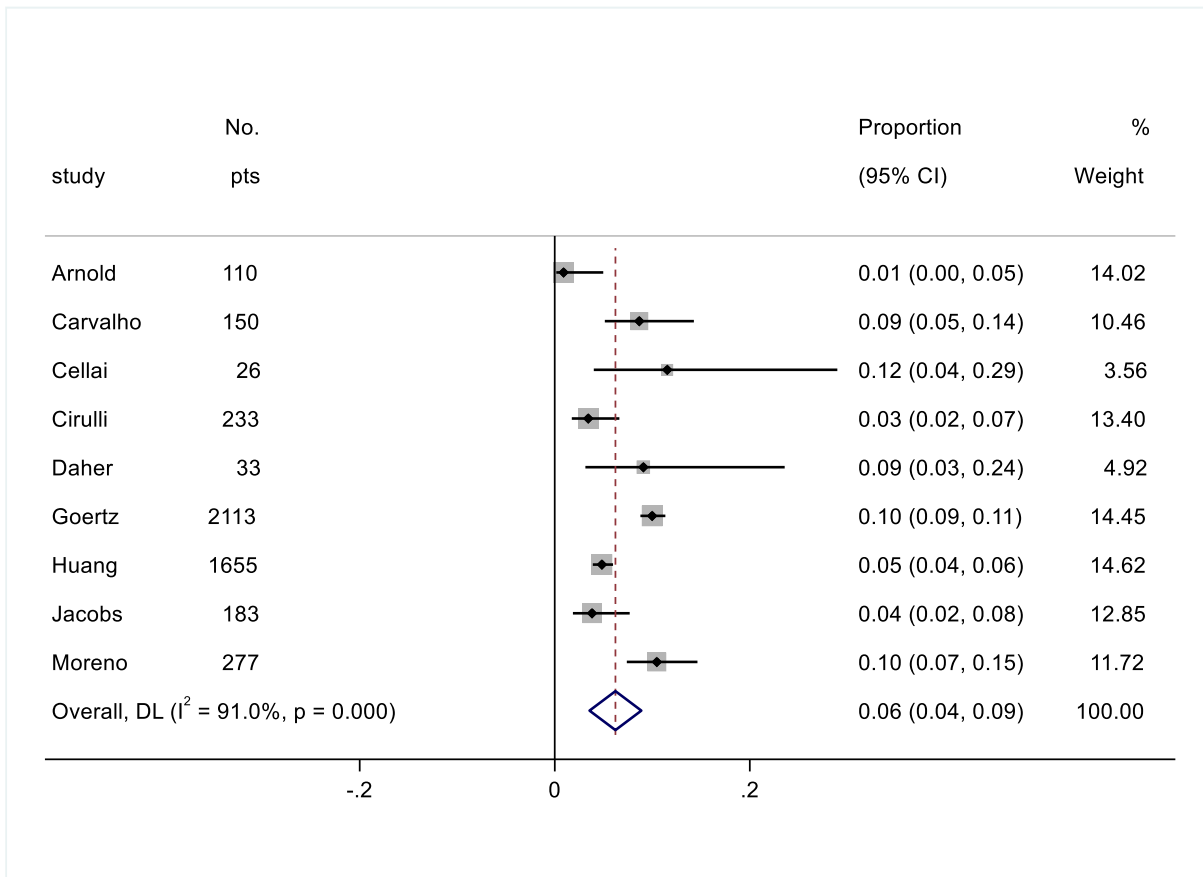

Figure S7. Pooled estimate of the prevalence of diarrhoea in patients with long COVID-19
